# Supplementary material
Source: PubMed Central journal article supplement (PMC4788272)
Supplement: id5b00022_si_001.pdf [file id5b00022_si_001.pdf]

## Network analysis reveals sex and antibiotic resistance-associated antivirulence targets in clinical uropathogens

Kaveri S. Parker<sup>1,2,3</sup>, James D. Wilson<sup>4</sup>, Jonas Marschall<sup>2,3,6</sup>, Peter J. Mucha<sup>5\*</sup>, Jeffrey P. Henderson<sup>1,2,3\*</sup>

<sup>1</sup>Center for Women's Infectious Diseases Research, <sup>2</sup>Division of Infectious Diseases, <sup>3</sup>Department of Internal Medicine, Washington University in St. Louis, St. Louis, Missouri, United States of America, <sup>4</sup>Department of Mathematics and Statistics, the University of California, San Francisco, United States of America, <sup>5</sup>Carolina Center for Interdisciplinary Applied Mathematics, Department of Mathematics, University of North Carolina, Chapel Hill, North Carolina, United States of America, <sup>6</sup>Department of Infectious Diseases, Bern University Hospital and University of Bern, Bern, Switzerland

\*Co-corresponding authors

### In this file:

- **Supplementary figures**

| <b>*Jeffrey P. Henderson, M.D. Ph.D.</b>                                                                                                                                                                                            | <b>*Peter J. Mucha, Ph.D.</b>                                                                                                                           |
|-------------------------------------------------------------------------------------------------------------------------------------------------------------------------------------------------------------------------------------|---------------------------------------------------------------------------------------------------------------------------------------------------------|
| Center for Women's Infectious Disease Research<br>Box 8051 Washington University School of<br>Medicine<br>660 S. Euclid Ave., St. Louis, MO 63110<br>E-mail: <a href="mailto:jhenderson@DOM.wustl.edu">jhenderson@DOM.wustl.edu</a> | Department of Mathematics<br>120 E. Cameron Avenue<br>CB#3250, UNC<br>Chapel Hill, NC 27599<br>E-mail: <a href="mailto:mucha@unc.edu">mucha@unc.edu</a> |

**Table S1. Distributions of stereotypical virulence groupings within clinical isolate phylogenetic groups.**

|                     | <b>A</b><br><b>(n = 10)</b> | <b>B1</b><br><b>(n = 41)</b> | <b>B2</b><br><b>(n = 232)</b> | <b>D</b><br><b>(n = 54)</b> |
|---------------------|-----------------------------|------------------------------|-------------------------------|-----------------------------|
| <b>CI community</b> |                             |                              |                               |                             |
| C1                  | 0                           | 0                            | 38                            | 7                           |
| C2                  | 0                           | 2                            | 109                           | 7                           |
| C3                  | 0                           | 0                            | 75                            | 1                           |
| C4                  | 10                          | 39                           | 10                            | 39                          |
| <b>bicluster</b>    |                             |                              |                               |                             |
| BC1                 | 0                           | 0                            | 76                            | 8                           |
| BC2                 | 0                           | 1                            | 0                             | 0                           |
| BC3                 | 0                           | 0                            | 0                             | 1                           |
| BC4                 | 0                           | 2                            | 3                             | 24                          |
| BC1+2               | 0                           | 0                            | 89                            | 0                           |
| BC1+3               | 0                           | 0                            | 49                            | 0                           |
| BC2+4               | 0                           | 2                            | 0                             | 8                           |
| BC1+2+3             | 0                           | 0                            | 12                            | 0                           |
| none                | 10                          | 36                           | 3                             | 13                          |

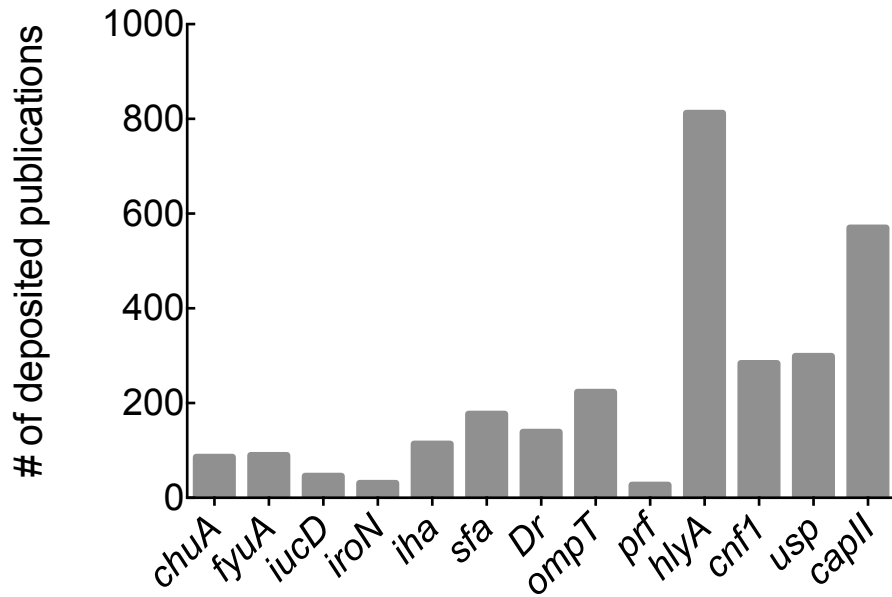

**Figure S1. Total publications addressing virulence factors used in this study exceed 2,700.** The figure shows the distribution of papers recorded in PubMed using each virulence factor as a query [(virulence factor\*) AND (UPEC\* OR E.coli\*)]. The search was conducted on 3 February 2014.

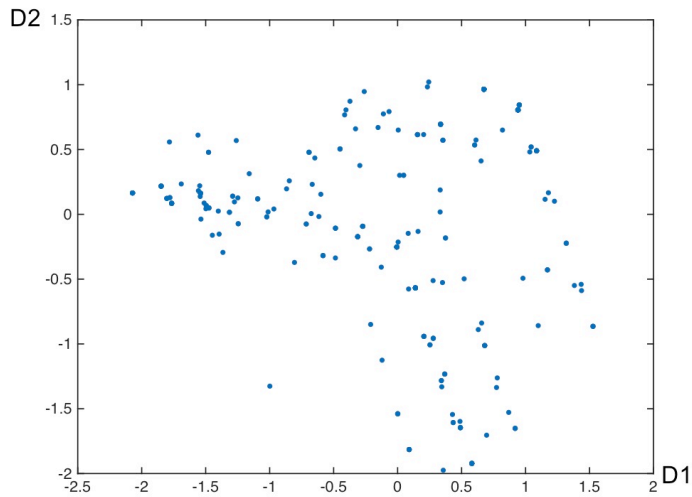

**Figure S2. Principal component analysis (PCA) plot does not identify organized clusters.** Principal Component Analysis (PCA) projects the original 16-dimensional point cloud data representing VF presence (1) and absence (0) in a specified CI into a lower-dimensional Euclidean subspace. While some of the outlying points of this projection hint at possible organization, there is no strong clustering indicated in this figure.

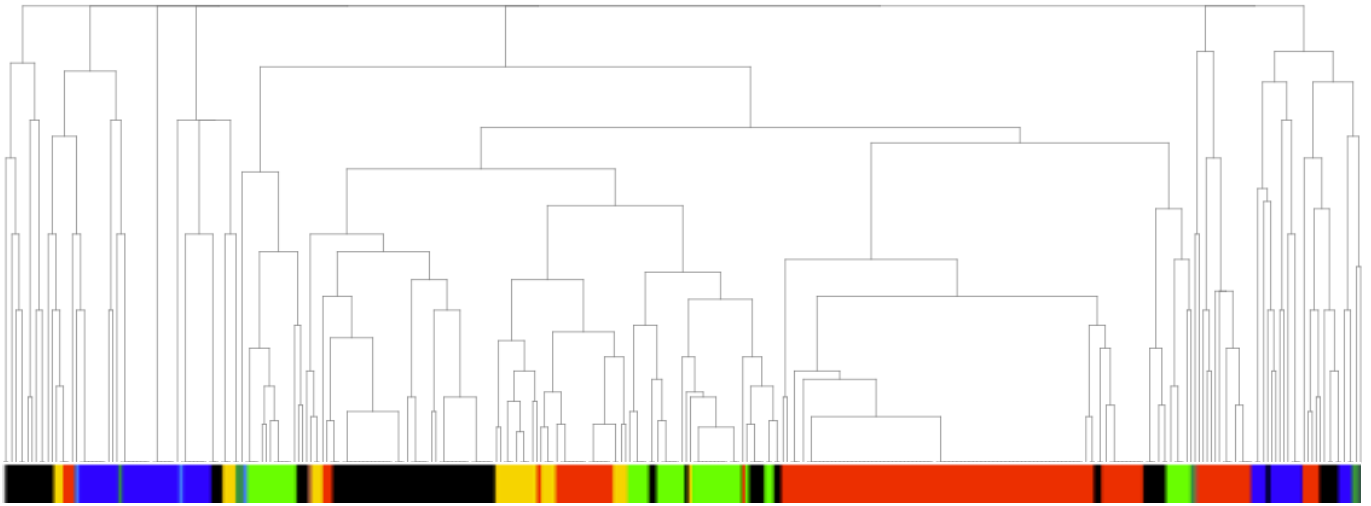

**Figure S3. Naïve hierarchical analysis can yield complex solutions.** Complete hierarchical clustering of the data yields seven clinical isolate groups. We chose the number of clusters,  $k$ , according to the clustering that had the largest average between cluster sum of squares (BCSS). To do this, we calculate the BCSS of the clusters identified by Hierarchical Clustering for  $k$  from 2 to 336.

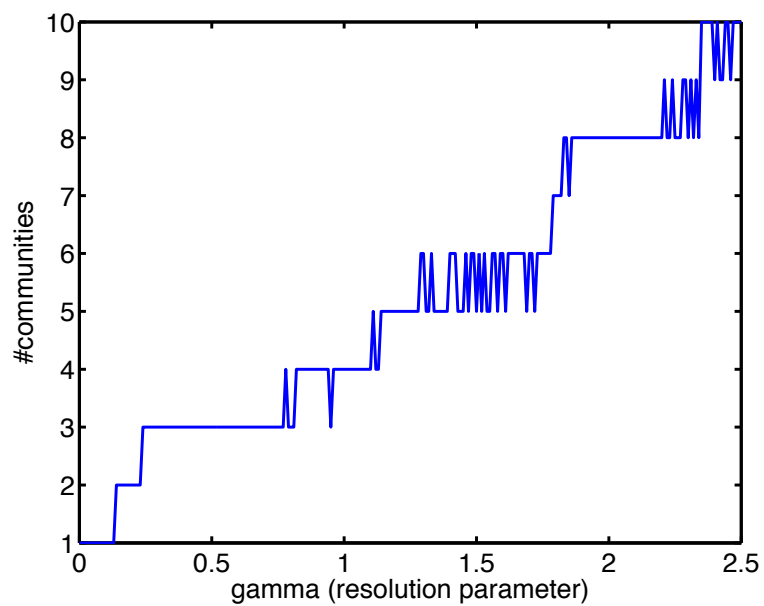

**Figure S4. Gamma ( $\gamma$ ) resolution parameter for community detection.** Multiple plateaus of different numbers of **CI communities are indicated**. The plateau of four communities is indicated robustly for  $\gamma$  near its default value ( $\gamma=1$ ).
